# Supplementary material for: An Integrated Map of HIV-Human Protein Complexes that Facilitate Viral Infection
Source: PLoS One. 2014 May 9;9(5):e96687. doi: 10.1371/journal.pone.0096687 (PMC4016004; doi:10.1371/journal.pone.0096687)
Supplement: Table S2 — Genes selected for validation. Sheet 1 shows the 16 genes that were randomly drawn from the high-confidence set together with their RNAi result. Sheet 2 shows the list of genes randomly selected from the human genome together with their RNAi results. (XLSX) [file pone.0096687.s002.xlsx]

## Sheet: Subset of RNAi-HIV set
Entrez Gene ID	Symbol	Class
60	ACTB	No effect
71	ACTG1	No effect
1213	CLTC	No effect
3183	HNRNPC	No effect
3312	HSPA8	No effect
3608	ILF2	No effect
6599	SMARCC1	RNAi phenotype
6601	SMARCC2	RNAi phenotype
7203	CCT3	No effect
7415	VCP	RNAi phenotype
7520	XRCC5	No effect
8894	EIF2S2	RNAi phenotype
10575	CCT4	No effect
10694	CCT8	No effect
22948	CCT5	No effect
347733	TUBB2B	RNAi phenotype

## Sheet: Random genes
Entrez Gene ID	Symbol	Class
190	NR0B1	No effect
199	AIF1	No effect
321	APBA2	No effect
597	BCL2A1	No effect
1186	CLCN7	No effect
2137	EXTL3	No effect
2557	GABRA4	No effect
2624	GATA2	No effect
2746	GLUD1	No effect
3250	HP	No effect
3621	ING1	No effect
5224	PGAM2	No effect
6576	SLC25A1	No effect
6856	SYPL1	No effect
8237	USP11	No effect
8314	BAP1	No effect
8547	FCN3	RNAi phenotype
8775	NAPA	No effect
9654	TTLL4	No effect
9748	SLK	No effect
10135	NAMPT	No effect
10154	PLXNC1	No effect
10550	ARL6IP5	No effect
10750	GRAP	No effect
11313	LYPLA2P1	No effect
23016	EXOSC7	No effect
29896	TRA2A	No effect
50616	IL22	No effect
51143	DYNC1LI1	No effect
51499	TRIAP1	No effect
51809	GALNT7	No effect
55240	STEAP3	No effect
55756	INTS9	No effect
55819	RNF130	RNAi phenotype
56667	MUC13	No effect
57020	C16ORF62	No effect
57222	ERGIC1	No effect
57677	ZFP14	No effect
60529	ALX4	No effect
64850	AGXT2L1	No effect
84289	ING5	No effect
93649	MYOCD	No effect
113444	C1ORF212	No effect
114569	MAL2	No effect
116843	C6ORF192	No effect
143458	LDLRAD3	No effect
219699	UNC5B	No effect
253714	MMS22L	RNAi phenotype
254950	KRTAP15-1	No effect
259217	HSPA12A	No effect
319101	KRT73	No effect
374946	C1ORF187	No effect
375748	C9ORF102	No effect
389336	C5ORF46	No effect
